# Supplementary material for: Behavioural difficulties in early childhood and risk of adolescent injury
Source: PubMed Central journal article supplement (PMC7041499; doi:10.1136/archdischild-2019-317271), 2019-10-30
Supplement: archdischild-2019-317271supp001.pdf [file archdischild-2019-317271supp001.pdf]

**Appendix A1: ICD10 injury codes**

| <b>Chapter XIX Injury, poisoning and certain other consequences of external causes</b> |                     |
|----------------------------------------------------------------------------------------|---------------------|
| Injuries to the head                                                                   | S00-S09             |
| Injuries to the neck                                                                   | S10-S19             |
| Injuries to the thorax                                                                 | S20-S29             |
| Injuries to the abdomen, lower back, lumbar spine and pelvis                           | S30-S39             |
| Injuries to the shoulder and upper arm                                                 | S40-S49             |
| Injuries to the elbow and forearm                                                      | S50-S59             |
| Injuries to the wrist and hand                                                         | S60-S69             |
| Injuries to the hip and thigh                                                          | S70-S79             |
| Injuries to the knee and lower leg                                                     | S80-S89             |
| Injuries to the ankle and foot                                                         | S90-S99             |
| Injuries involving multiple body regions                                               | T00-T07             |
| Injuries to unspecified part of trunk, limb or body region                             | T08-T14             |
| Effects of foreign body entering through natural orifice                               | T15-T19             |
| Burns and corrosions                                                                   | T20-T32             |
| Frostbite                                                                              | T33-T35             |
| Poisoning by drugs, medicaments and biological substances                              | T36-T50             |
| Toxic effects of substances chiefly nonmedicinal as to source                          | T51-T65             |
| Effects of air pressure and water pressure                                             | T704, T708,<br>T709 |
| Asphyxiation                                                                           | T71                 |
| Maltreatment syndromes                                                                 | T741-T749           |
| Effects of other external causes                                                       | T751, T754, T79     |
| <b>Chapter XX External causes of morbidity and mortality</b>                           |                     |
| Pedestrian injured in transport accident                                               | V01-V09             |
| Pedal cyclist injured in transport accident                                            | V10-V19             |
| Motorcycle rider injured in transport accident                                         | V20-V29             |
| Occupant of three-wheeled motor vehicle injured in transport accident                  | V30-V39             |
| Car occupant injured in transport accident                                             | V40-V49             |
| Occupant of pick-up truck or van injured in transport accident                         | V50-V59             |
| Occupant of heavy transport vehicle injured in transport accident                      | V60-V69             |
| Bus occupant injured in transport accident                                             | V70-V79             |
| Other land transport accidents                                                         | V80-V89             |
| Water transport accidents                                                              | V90-V94             |
| Air and space transport accidents                                                      | V95-V97             |
| Other and unspecified transport accidents                                              | V98-V99             |
| Falls                                                                                  | W00-W19             |
| Exposure to inanimate mechanical forces                                                | W20-W49             |
| Exposure to animate mechanical forces                                                  | W50-W64             |

|                                                                                           |                                                            |
|-------------------------------------------------------------------------------------------|------------------------------------------------------------|
| Accidental drowning and submersion                                                        | W65-W74                                                    |
| Other accidental threats to breathing                                                     | W75-W84                                                    |
| Exposure to electric current, radiation and extreme ambient air temperature and pressure  | W85-W99                                                    |
| Exposure to smoke, fire and flames                                                        | X00-X09                                                    |
| Contact with heat and hot substances                                                      | W00-W19                                                    |
| Contact with venomous animals and plants                                                  | W20-W49                                                    |
| Exposure to forces of nature                                                              | W50-W64                                                    |
| Accidental poisoning by and exposure to noxious substances                                | W65-W74                                                    |
| Intentional self-harm                                                                     | X60-X84                                                    |
| Assault                                                                                   | X85-Y09                                                    |
| Event of undetermined intent                                                              | Y10-Y34                                                    |
| Legal intervention and operations of war                                                  | Y35-Y36                                                    |
| Evidence of alcohol involvement determined by blood alcohol level / level of intoxication | Y90-Y91                                                    |
| <b>Chapter V Mental and behavioural disorders</b>                                         |                                                            |
| Mental and behavioural disorders due to psychoactive substance use – acute intoxication   | F100, F110, F120, F130, F140, F150, F160, F170, F180, F190 |
