# Supplementary material for: Behavioural difficulties in early childhood and risk of adolescent injury
Source: PubMed Central journal article supplement (PMC7041499; doi:10.1136/archdischild-2019-317271), 2019-10-30
Supplement: archdischild-2019-317271supp002.pdf [file archdischild-2019-317271supp002.pdf]

**Appendix A2: Welsh A&E (EDDS) injury codes**

| <b>Variable name</b> | <b>Value</b> | <b>Meaning</b>                                             |
|----------------------|--------------|------------------------------------------------------------|
|                      |              | <b>Wound</b>                                               |
| Diagnosis code       | 03A          | Laceration                                                 |
|                      | 03B          | Contusion                                                  |
|                      | 03C          | Abrasion                                                   |
|                      | 03D          | Soft tissue inflammation                                   |
|                      | 03Z          | Wound, other or unspecified                                |
|                      |              | <b>Head Injury</b>                                         |
|                      | 02A          | Glasgow Coma Score 35                                      |
|                      | 02B          | Glasgow Coma Score <35                                     |
|                      | 02C          | Dental Injury                                              |
|                      | 02Z          | Head Injury, other or unspecified                          |
|                      |              | <b>Fracture</b>                                            |
|                      | 03A          | Open Fracture                                              |
|                      | 03B          | Closed Fracture                                            |
|                      | 03C          | Fracture Dislocation                                       |
|                      | 03Z          | Fracture, other or unspecified                             |
|                      |              | <b>Joint Injury</b>                                        |
|                      | 04A          | Sprain                                                     |
|                      | 04B          | Dislocation                                                |
|                      | 04C          | Subluxation                                                |
|                      | 04Z          | Joint Injury, other or unspecified                         |
|                      |              | Amputation                                                 |
|                      | 05Z          | Amputation, other or unspecified                           |
|                      |              | <b>Soft Tissue Injury</b>                                  |
|                      | 06A          | Muscle Injury                                              |
|                      | 06B          | Tendon Injury                                              |
|                      | 06C          | Nerve Injury                                               |
|                      | 06D          | Visceral Injury                                            |
|                      | 06E          | Vascular Injury                                            |
|                      | 06Z          | Soft Tissue Injury, other or unspecified                   |
|                      |              | <b>Burns, Scalds and Thermal Conditions</b>                |
|                      | 07A          | Electric                                                   |
|                      | 07B          | Chemical                                                   |
|                      | 07C          | Radiation                                                  |
|                      | 07D          | Scald                                                      |
|                      | 07E          | Sunburn                                                    |
|                      | 07F          | Hyperthermia                                               |
|                      | 07G          | Hypothermia                                                |
|                      | 07H          | Frostbite                                                  |
|                      | 07Z          | Burns, Scalds and Thermal Conditions, other or unspecified |
|                      |              | <b>Foreign Body</b>                                        |
|                      | 08A          | Ingested Foreign Body                                      |
|                      | 08Z          | Foreign Body, other or unspecified                         |

|                |     |                                             |
|----------------|-----|---------------------------------------------|
|                |     | Puncture Wounds                             |
|                | 09A | Needle Stick Injury                         |
|                | 09B | Human Bite                                  |
|                | 09C | Animal Bite                                 |
|                | 09D | Insect Bite or Sting                        |
|                | 09Z | Puncture Wounds, other or unspecified       |
|                |     | <b>Poisoning or Overdose</b>                |
|                | 30A | Alcohol                                     |
|                | 30B | Prescribed Drug                             |
|                | 30C | Non-prescribed/purchased drug               |
|                | 30D | Illicit Drug                                |
|                | 30Z | Poisoning or Overdose, other or unspecified |
|                |     | <b>Drowning</b>                             |
|                | 33A | Near Drowning                               |
|                | 33Z | Drowning, other or unspecified              |
|                |     |                                             |
| Diagnosis code |     | All ICD 10 mentioned in Appendix 1          |
|                |     |                                             |
| Treatment code |     | <b>Wound Closure</b>                        |
|                | 03Z | Wound Closure                               |
|                |     | Removal Foreign Body                        |
|                | 04Z | Removal Foreign Body                        |
|                |     | Manipulation                                |
|                | 06Z | Manipulation                                |
