# Supplementary material for: Behavioural difficulties in early childhood and risk of adolescent injury
Source: PubMed Central journal article supplement (PMC7041499; doi:10.1136/archdischild-2019-317271), 2019-10-30
Supplement: archdischild-2019-317271supp003.pdf [file archdischild-2019-317271supp003.pdf]

**Appendix A3: Scottish A&E (A&E2) injury codes**

| <b>Variable name</b> | <b>Value</b> | <b>Meaning</b>                       |
|----------------------|--------------|--------------------------------------|
| Nature of injury     | 01           | <b>Wound</b>                         |
|                      | 01A          | Abrasion                             |
|                      | 01B          | Contusion includes bruise, haematoma |
|                      | 01C          | Blisters                             |
|                      | 01D          | Laceration                           |
|                      | 01E          | Incision                             |
|                      | 01F          | Needlestick                          |
|                      | 01G          | Bite animal                          |
|                      | 01H          | Bite human                           |
|                      | 01J          | Bite/sting insect                    |
|                      | 01K          | Flap laceration                      |
|                      | 01L          | Degloving wound                      |
|                      | 01M          | Penetrating wound                    |
|                      | 01N          | Skin avulsion                        |
|                      | 01Z          | Other                                |
|                      |              |                                      |
|                      | 02           | <b>Bone and joint injury</b>         |
|                      | 02A          | Closed fracture                      |
|                      | 02B          | Open fracture                        |
|                      | 02C          | Dislocation of joint                 |
|                      | 02D          | Fracture dislocation                 |
|                      |              |                                      |
|                      | 03           | <b>Soft tissue injury</b>            |
|                      | 03A          | Crush injury                         |
|                      | 03B          | Ligament avulsion                    |
|                      | 03C          | Ligament tear                        |
|                      | 03D          | Ligament rupture                     |
|                      | 03E          | Ligament strain                      |
|                      | 03F          | Muscle avulsion                      |
|                      | 03G          | Muscle tear                          |
|                      | 03H          | Muscle rupture                       |
|                      | 03J          | Muscle strain                        |
|                      | 03K          | Tendon dislocation                   |
|                      | 03L          | Tendon rupture                       |
|                      | 03M          | Tendon subluxation                   |
|                      | 03N          | Tendon strain                        |
|                      | 03P          | Tendon division                      |
|                      | 03Q          | Neuropraxia                          |
|                      | 03R          | Nerve compression                    |
|                      | 03S          | Complete transection of nerve        |
|                      | 03T          | Partial division of nerve            |
|                      | 03U          | Nerve contusion                      |
|                      | 03V          | Nerve entrapment                     |

|  |     |                              |
|--|-----|------------------------------|
|  | 03Z | Other Soft tissue injury     |
|  |     |                              |
|  | 04  | <b>Head Injury</b>           |
|  | 04A | Concussion                   |
|  | 04B | Extradural Haemorrhage       |
|  | 04C | Subdural Haemorrhage         |
|  | 04D | Traumatic cerebral oedema    |
|  | 04Z | Other head injury            |
|  |     |                              |
|  | 05  | <b>Dental Injury</b>         |
|  | 05A | Avulsion                     |
|  | 05B | Fracture                     |
|  | 05Z | Other dental injury          |
|  |     |                              |
|  | 06  | <b>Vascular Injury</b>       |
|  | 06A | Arterial haemorrhage         |
|  | 06B | Arterial contusion           |
|  | 06C | Arterial avulsion            |
|  | 06D | Arterial perforation         |
|  | 06E | Arterial rupture             |
|  | 06F | Arterial transection         |
|  | 06G | Venous haemorrhage           |
|  | 06H | Venous contusion             |
|  | 06J | Venous avulsion              |
|  | 06K | Venous rupture               |
|  | 06L | Venous transection           |
|  | 06Z | Other vascula                |
|  |     |                              |
|  | 07  | <b>Visceral injury</b>       |
|  | 07A | Traumatic haemothorax        |
|  | 07B | Traumatic pneumothorax       |
|  | 07C | Pulmonary contusion          |
|  | 07D | Traumatic haemopneumothorax  |
|  | 07E | Traumatic haemopericardium   |
|  | 07F | Cardiac contusion            |
|  | 07G | Pneumomediastinum            |
|  | 07H | Rupture *                    |
|  | 07J | Perforation *                |
|  | 07K | Avulsion *                   |
|  |     |                              |
|  | 08  | <b>Burn</b>                  |
|  | 08A | 1st degree/duperficial       |
|  | 08B | 2nd degree/partial thickness |
|  | 08C | 3rd degree/full thickness    |
|  |     |                              |
|  | 09  | <b>Scald</b>                 |

|                |     |                                      |
|----------------|-----|--------------------------------------|
|                |     |                                      |
|                | 10  | Corrosion                            |
|                | 10A | 1st degree                           |
|                | 10B | 2nd degree                           |
|                | 10C | 3rd degree                           |
|                |     |                                      |
|                | 13  | <b>Frostbite</b>                     |
|                | 13A | Superficial                          |
|                | 13B | With tissue necrosis                 |
|                | 13Z | Other frostbite                      |
|                |     |                                      |
|                | 14  | <b>Poisoning</b>                     |
|                | 15  | Electric shock                       |
|                | 16  | Multiple injuries                    |
|                | 98  | Other nature of injury               |
|                |     |                                      |
| Diseases code  |     | All ICD 10 mentioned in Appendix 1   |
|                |     |                                      |
| Diagnosis code | 01  | Trauma/injury/poisoning              |
|                |     |                                      |
| Procedure code | 01  | Wound care                           |
|                | 02  | Burn care                            |
|                | 03  | Limb immobilisation                  |
|                | 04A | Reduction of dislocation             |
|                | 04B | Manipulation of fracture             |
|                | 11A | Removal of foreign body from orifice |
